# Supplementary material for: Functional plasticity shapes neutrophil response to Leishmania major infection in susceptible and resistant strains of mice
Source: PubMed Central journal article supplement (PMC11488723; doi:10.1371/journal.ppat.1012592), 2024-10-08

**Figure S12**

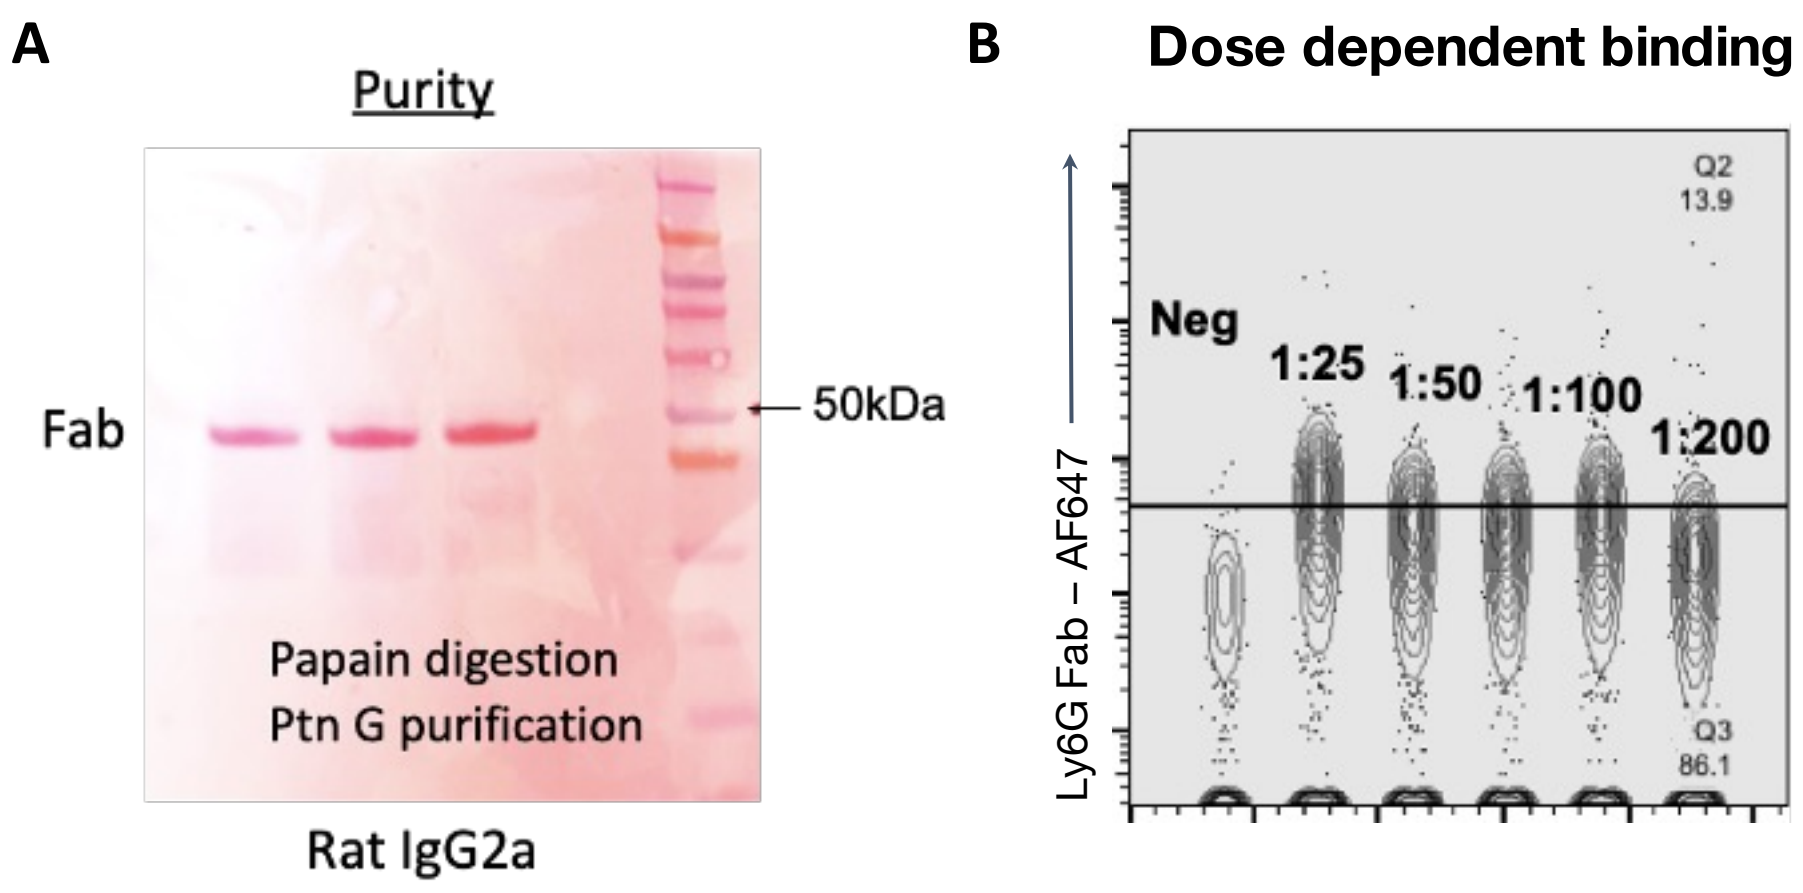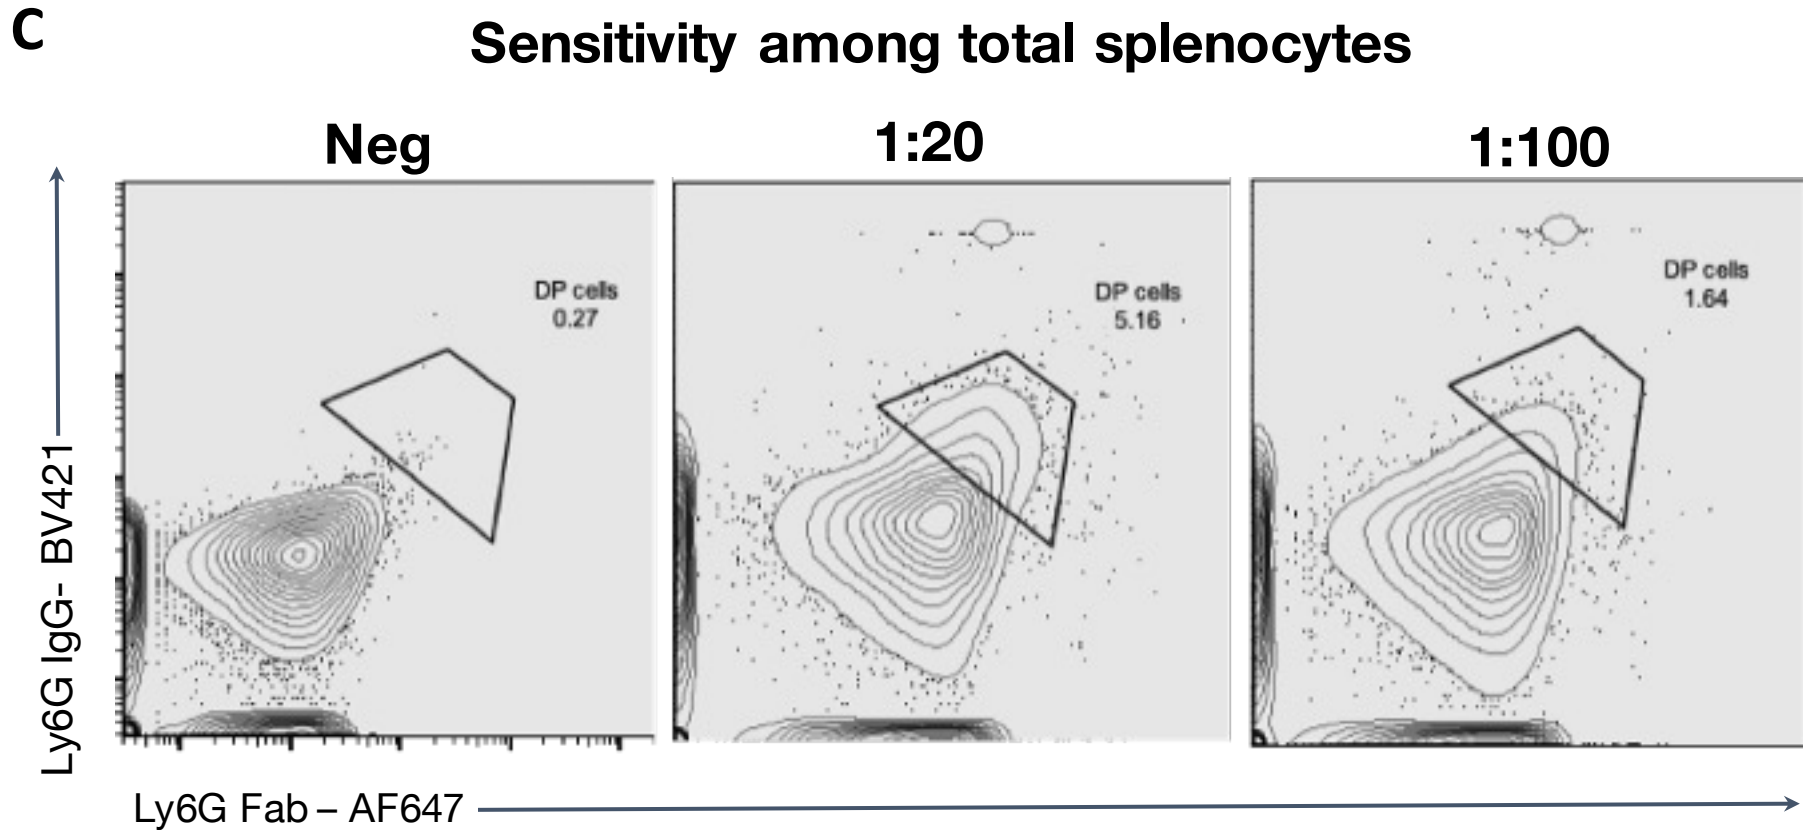

Supplement: ppat.1012592.s012.pdf [file ppat.1012592.s012.pdf]
