# Supplementary material for: Functional plasticity shapes neutrophil response to Leishmania major infection in susceptible and resistant strains of mice
Source: PubMed Central journal article supplement (PMC11488723; doi:10.1371/journal.ppat.1012592), 2024-10-08
Supplement: ppat.1012592.s018.pdf [file ppat.1012592.s018.pdf]

Table S1

| List of manually curated genes related to neutrophils extracellular traps formation or phagocytosis |              |          |
|-----------------------------------------------------------------------------------------------------|--------------|----------|
| Symbol.human                                                                                        | Symbol.mouse | Interest |
| PADI4                                                                                               | Padi4        | NET      |
| ELANE                                                                                               | Elane        | NET      |
| MPO                                                                                                 | Mpo          | NET      |
| CYBB                                                                                                | Cybb         | NET      |
| CYBA                                                                                                | Cyba         | NET      |
| NOX1                                                                                                | Nox1         | NET      |
| NOX3                                                                                                | Nox3         | NET      |
| NOX4                                                                                                | Nox4         | NET      |
| NOX5                                                                                                | NA           | NET      |
| NOXO1                                                                                               | Noxo1        | NET      |
| NOXA1                                                                                               | Noxa1        | NET      |
| PRKCA                                                                                               | Prkca        | NET      |
| PRKCG                                                                                               | Prkcg        | NET      |
| PRKCB                                                                                               | Prkcb        | NET      |
| PRKCZ                                                                                               | Prkcz        | NET      |
| PRKCC                                                                                               | NA           | NET      |
| PRKCE                                                                                               | Prkce        | NET      |
| PRKCD                                                                                               | Prkcd        | NET      |

|        |        |     |
|--------|--------|-----|
| PIK3CG | Pik3cg | NET |
| PIK3CD | Pik3cd | NET |
| MAPK1  | Mapk1  | NET |
| MAP2K1 | Map2k1 | NET |
| MAPK3  | Mapk3  | NET |
| DNASE1 | Dnase1 | NET |
| GSDMD  | Gsdmd  | NET |
| GSDME  | Gsdme  | NET |
| GSDMB  | NA     | NET |
| GSDMA  | Gsdma  | NET |
| GSDMA  | Gsdma2 | NET |
| GSDMA  | Gsdma2 | NET |
| GSDMC  | Gsdmc4 | NET |
| GSDMC  | Gsdmc  | NET |
| GSDMC  | Gsdmc3 | NET |
| GSDMC  | Gsdmc2 | NET |
| MMP9   | Mmp9   | NET |
| MMP2   | Mmp2   | NET |
| MMP1   | Mmp1a  | NET |
| MMP14  | Mmp14  | NET |
| MMP3   | Mmp3   | NET |

|         |         |              |
|---------|---------|--------------|
| MMP7    | Mmp7    | NET          |
| MMP12   | Mmp12   | NET          |
| MMP8    | Mmp8    | NET          |
| MMP10   | Mmp10   | NET          |
| MMP15   | Mmp15   | NET          |
| TIMP2   | Timp2   | NET          |
| TIMP1   | Timp1   | NET          |
| TIMP3   | Timp3   | NET          |
| CLEC7A  | Clec7a  | Phagocytosis |
| CLEC6A  | Clec4n  | Phagocytosis |
| TLR2    | Tlr2    | Phagocytosis |
| TLR4    | Tlr4    | Phagocytosis |
| ITGAM   | Itgam   | Phagocytosis |
| ITGB2   | Itgb2   | Phagocytosis |
| CLEC12A | Clec12a | Phagocytosis |
| CLEC4E  | Clec4e  | Phagocytosis |
| CLEC9A  | Clec9a  | Phagocytosis |
| MSR1    | Msr1    | Phagocytosis |
| MARCO   | Marco   | Phagocytosis |
| CD36    | Cd36    | Phagocytosis |
| CD33    | NA      | Phagocytosis |

|         |          |              |
|---------|----------|--------------|
| SIGLEC1 | Siglec1  | Phagocytosis |
| MTOR    | Mtor     | NET          |
| PRKAR1A | Prkar1a  | NET          |
| PRKAR1B | Prkar1b  | NET          |
| PRKAR2A | Prkar2a  | NET          |
| PRKAR2B | Prkar2b  | NET          |
| CXCL2   | Cxcl1    | NET          |
| HIF1A   | Hif1a    | NET          |
| CD63    | Cd63     | Phagocytosis |
| CEACAM8 | Ceacam10 | Phagocytosis |
| CEACAM8 | Ceacam2  | Phagocytosis |
| CEACAM8 | Ceacam10 | Phagocytosis |
| ACTR2   | Actr2    | Phagocytosis |
| WAS     | Was      | Phagocytosis |
| WASL    | Wipf1    | Phagocytosis |
| WIPF1   | Washc1   | Phagocytosis |
| WASHC1  | Washc1   | Phagocytosis |
| WASHC4  | Washc4   | Phagocytosis |
| WASHC5  | Washc5   | Phagocytosis |
| WASHC5C |          | Phagocytosis |
| WASHC2A | Washc2   | Phagocytosis |

|        |        |              |
|--------|--------|--------------|
| WASHC3 | Washc3 | Phagocytosis |
| WHAMM  | Whamm  | Phagocytosis |
| JMY    | Jmy    | Phagocytosis |
| VAV1   | Vav1   | Phagocytosis |
| VAV2   | Vav2   | Phagocytosis |
| VAV3   | Vav3   | Phagocytosis |
| ARF6   | Arf6   | Phagocytosis |
| VAMP3  | Vamp3  | Phagocytosis |
| CDC42  | Cdc42  | Phagocytosis |
| RHO    | Rho    | Phagocytosis |
| RAC1   | Rac1   | Phagocytosis |
| RAC2   | Rac2   | Phagocytosis |
| TRIM23 | Trim23 | Phagocytosis |
| ARF1   | Arf1   | Phagocytosis |
| ARF3   | Arf3   | Phagocytosis |
| ARF4   | Arf4   | Phagocytosis |
| ARF5   | Arf5   | Phagocytosis |
| ARF6   | Arf6   | Phagocytosis |
| ARL1   | Arl1   | Phagocytosis |
| ARL2   | Arl2   | Phagocytosis |
| ARL3   | Arl3   | Phagocytosis |

|        |        |              |
|--------|--------|--------------|
| ARL4A  | Arl4a  | Phagocytosis |
| ARL4C  | Arl4c  | Phagocytosis |
| ARL4D  | Arl4d  | Phagocytosis |
| ARL5A  | Arl5a  | Phagocytosis |
| ARL5B  | Arl5b  | Phagocytosis |
| ARL5C  | Arl5c  | Phagocytosis |
| ARL6   | Arl6   | Phagocytosis |
| ARL8A  | Arl8a  | Phagocytosis |
| ARL8B  | Arl8b  | Phagocytosis |
| ARL9   | Arl9   | Phagocytosis |
| ARL10  | Arl10  | Phagocytosis |
| ARL11  | Arl11  | Phagocytosis |
| ARL13A | Arl13a | Phagocytosis |
| ARL13B | Arl13b | Phagocytosis |
| ARL14  | Arl14  | Phagocytosis |
| ARL15  | Arl15  | Phagocytosis |
| ARL16  | Arl16  | Phagocytosis |
| ARL17A | Arf2   | Phagocytosis |
| ARL17B | Arf2   | Phagocytosis |
| ARFRP1 | Arfrp1 | Phagocytosis |
| SAR1A  | Sar1a  | Phagocytosis |

|       |       |              |
|-------|-------|--------------|
| SAR1B | Sar1b | Phagocytosis |
|-------|-------|--------------|
